# Supplementary figures and images for: Robot-assisted reaching exercise promotes arm movement recovery in chronic hemiparetic stroke: a randomized controlled pilot study
Source: Springer Nature journal article supplement (doi:10.1186/1743-0003-3-12), 2006-06-21

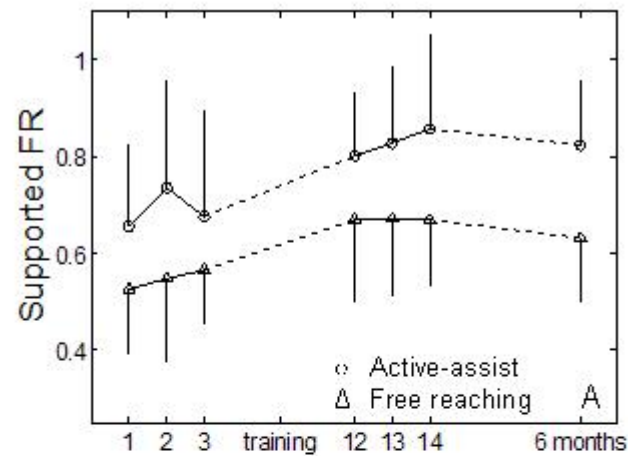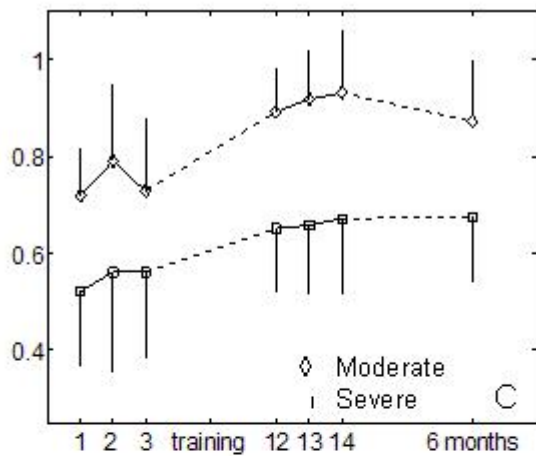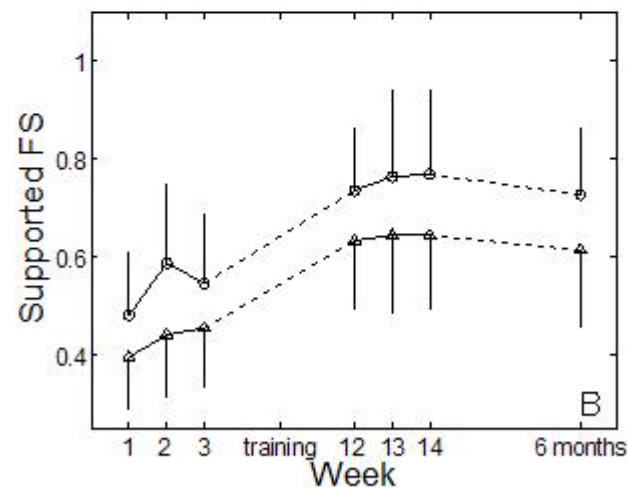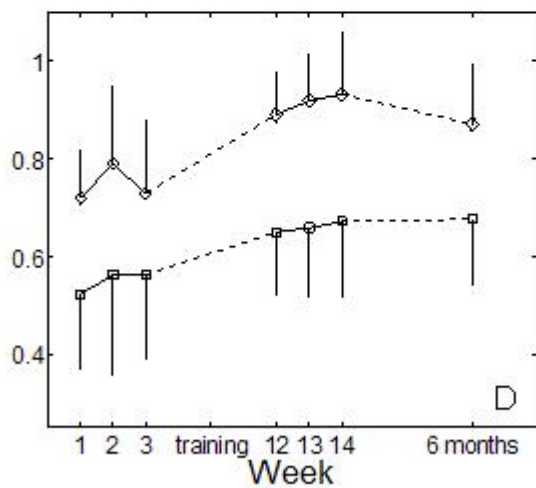

Supplement: 12984_2005_59_MOESM2_ESM.pdf [file 12984_2005_59_MOESM2_ESM.pdf]
